# Supplementary material
Source: MDPI journal article supplement (https://www.mdpi.com/2075-163X/14/3/290)
Supplement: s1 [file s1]

# Supplementary Materials: Neoproterozoic Lysan Alkaline-Ultramafic Complex in the Eastern Sayan, Southern Siberia, Russia: Mineralogical constraints of Carbonate Rocks and Albitite for petrogenesis

Tatiana B. Kolotilina\*, Aleksey S. Mekhonoshin and Yuri D. Shcherbakov

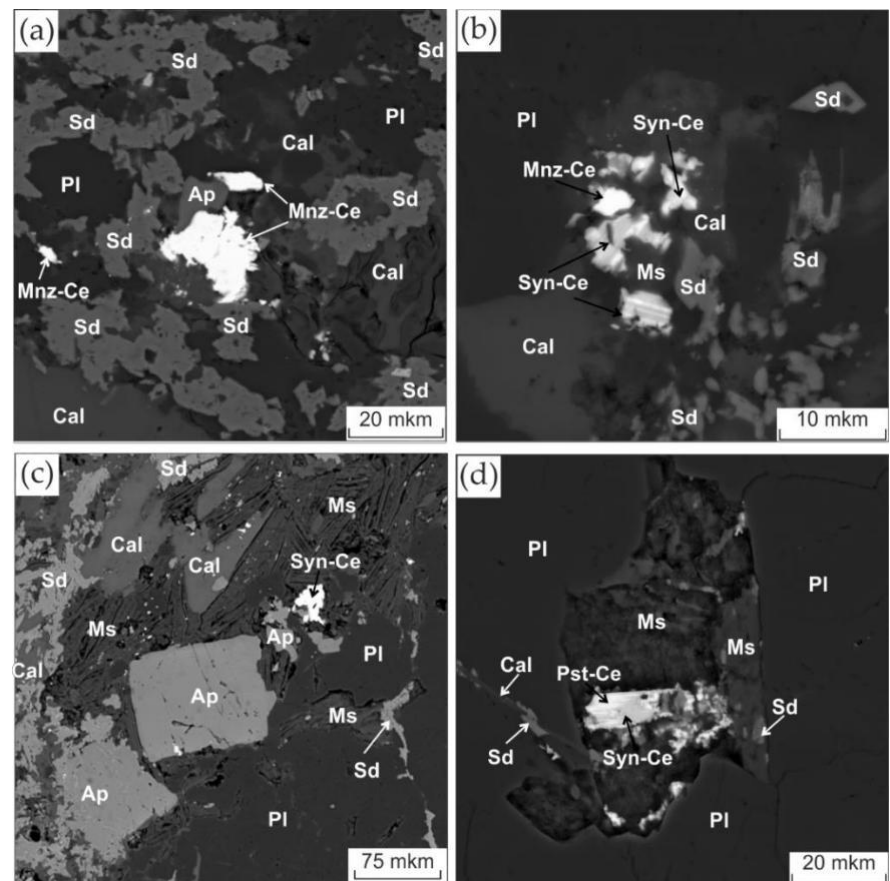

**Figure S1.** Relationships between rock-forming and accessory minerals in a calcite-siderite matrix. Cal – calcite, Sd – siderite, Ms – white mica, Pl – plagioclase, Ap – apatite, Syn-Ce – synchysite-(Ce), Pst-Ce – parsite-(Ce), Mnz-Ce – monazite-(Ce). BSE image.

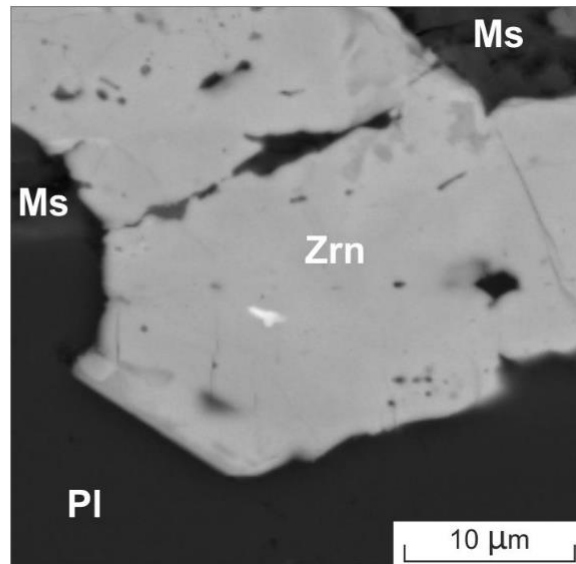

**Figure S2.** Baddeleyite (white) within zircon. Ms – white mica, Pl – plagioclase, Zrn – zircon. BSE image.

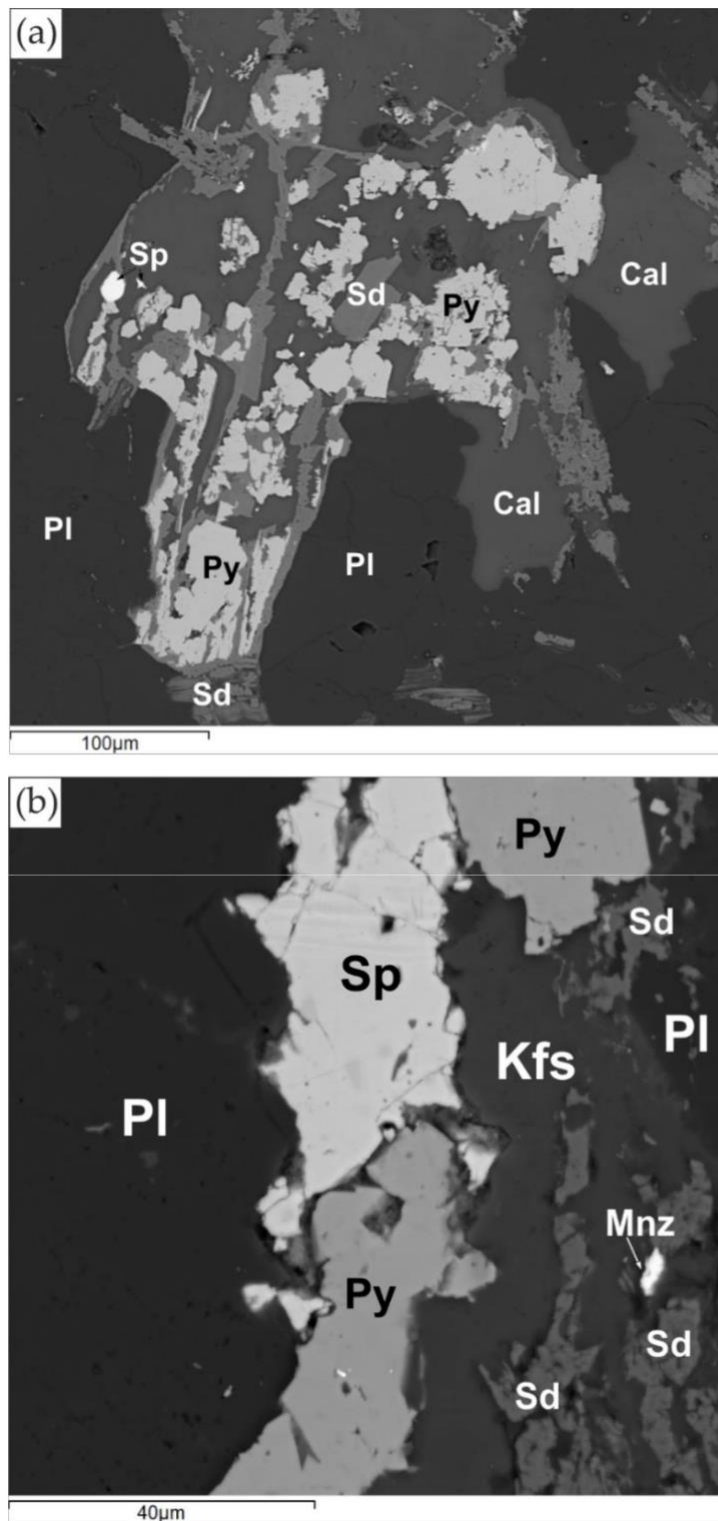

**Figure S3.** Sulphide. Cal – calcite, Sd – siderite, Mnz – monazite, Pl – plagioclase, Py – pyrite, Sp - sphalerite. BSE image.

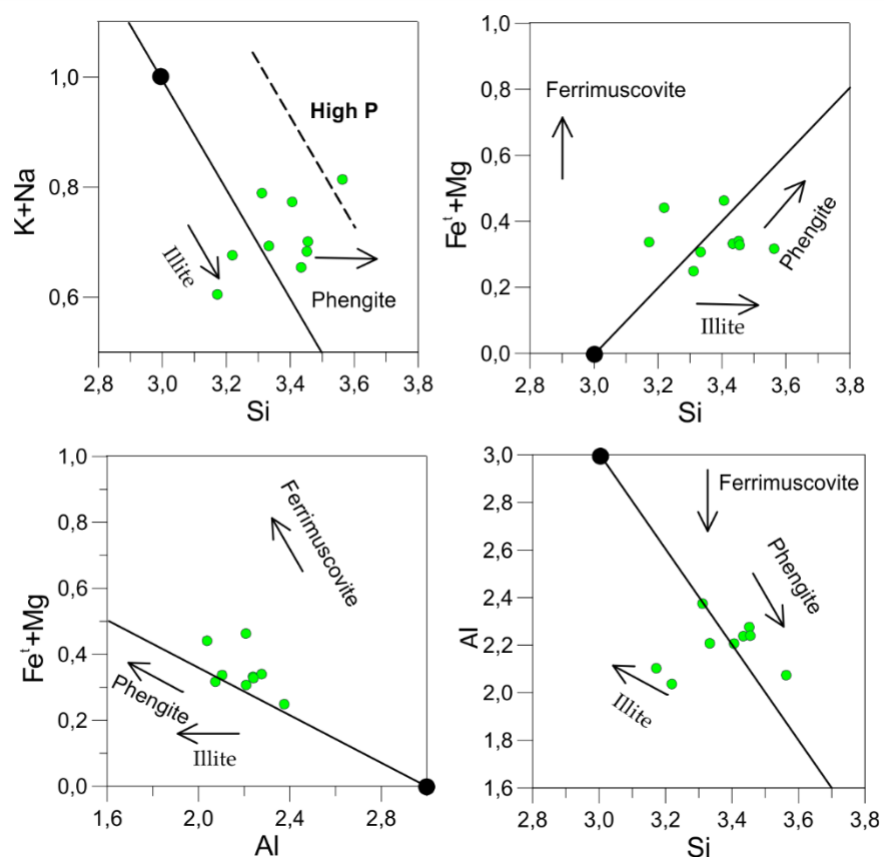

**Figure S4.** Diagrams of the chemical composition of white micas. Black points and solid lines respectively indicate the theoretical muscovite position and corresponding exchange vectors.

**Table S1.** Representative EPMA of white mica, wt. %

| Sample | SiO <sub>2</sub> | TiO <sub>2</sub> | Al <sub>2</sub> O <sub>3</sub> | FeO <sub>t</sub> | MgO  | K <sub>2</sub> O | Total |
|--------|------------------|------------------|--------------------------------|------------------|------|------------------|-------|
| 7821-1 | 54.52            | 0.38             | 26.93                          | 3.26             | 1.43 | 8.97             | 95.49 |
| 7821-1 | 50.21            | 1.73             | 30.55                          | 2.48             | 1.14 | 9.38             | 95.49 |
| 7821-1 | 52.86            | 0.53             | 29.07                          | 2.91             | 1.73 | 8.4              | 95.50 |
| 7821-1 | 50.7             | 3.74             | 28.5                           | 2.67             | 1.63 | 8.26             | 95.50 |
| 7821-3 | 47.87            | 8.35             | 26.93                          | 3.12             | 1.66 | 7.16             | 95.09 |
| 7821-3 | 52.7             | b.l.d.           | 29.14                          | 3.03             | 1.72 | 7.87             | 94.46 |
| 7821-3 | 47.92            | 6.9              | 25.74                          | 5.08             | 1.54 | 7.89             | 95.07 |
| 7821-3 | 51.12            | 0.28             | 28.1                           | 5.1              | 1.8  | 9.09             | 95.49 |
| 7821-3 | 52.85            | b.l.d.           | 29.57                          | 3.17             | 1.72 | 8.19             | 95.50 |

Note. b.d.l. - below detection limit

**Table S2.** Representative EPMA of apatite, wt. %

| Oxide<br>wt. %                 | 7821-1 | 7821-3 | 7821-3 | 7821   | 7821   | 7821   | 7821   |
|--------------------------------|--------|--------|--------|--------|--------|--------|--------|
| CaO                            | 53,80  | 54,09  | 52,99  | 53,31  | 53,55  | 53,77  | 53,51  |
| FeO                            | 0,66   | 0,70   | 0,79   | 0,59   | 0,51   | 0,51   | 0,50   |
| Ce <sub>2</sub> O <sub>3</sub> | 0,28   | b.l.d. | 0,92   | b.l.d. | b.l.d. | b.l.d. | b.l.d. |
| P <sub>2</sub> O <sub>5</sub>  | 40,35  | 40,78  | 39,08  | 40,56  | 40,27  | 40,50  | 40,30  |
| SiO <sub>2</sub>               | 0,53   | 0,00   | 1,32   | 0,16   | 0,53   | 0,68   | 0,64   |
| F                              | 4,18   | 4,20   | 3,90   | 4,49   | 4,23   | 4,45   | 4,58   |
| Total                          | 99,79  | 99,77  | 99,00  | 99,10  | 99,09  | 99,91  | 99,54  |

Note. b.d.l. - below detection limit

**Table S3.** Representative EPMA of monazite.

| Oxide<br>wt. %                            | 7821-1 | 7821-1 | 7821-1 | 7821-1 | 7821-1 | 7821-3 | 7821-3 | 7821-3 | 7821-3 | 7821-3 | 7821-3 |
|-------------------------------------------|--------|--------|--------|--------|--------|--------|--------|--------|--------|--------|--------|
| SiO <sub>2</sub>                          | 0.79   | 0.39   | 0.26   | 5.44   | 5.88   | 0.27   | 0.36   | b.d.l. | b.d.l. | 0.67   | 3.05   |
| FeO                                       | 1.08   | 1.37   | 1.69   | 1.15   | 1.84   | 1.00   | 0.91   | 0.92   | 1.00   | 1.37   | 0.00   |
| CaO                                       | 0.39   | 0.60   | 0.76   | 0.21   | 0.77   | 0.74   | 0.55   | 0.48   | 0.98   | 0.71   | 1.33   |
| P <sub>2</sub> O <sub>5</sub>             | 29.61  | 29.00  | 29.22  | 30.70  | 28.61  | 29.52  | 29.61  | 29.33  | 29.13  | 28.55  | 30.83  |
| Ce <sub>2</sub> O <sub>3</sub>            | 31.14  | 32.22  | 29.82  | 30.05  | 29.15  | 33.07  | 33.69  | 33.01  | 32.39  | 33.18  | 28.35  |
| La <sub>2</sub> O <sub>3</sub>            | 14.99  | 12.72  | 12.32  | 13.94  | 11.13  | 14.64  | 15.11  | 16.04  | 15.99  | 15.40  | 18.45  |
| Pr <sub>2</sub> O <sub>3</sub>            | 3.27   | 3.53   | 3.70   | 2.98   | 3.12   | 3.48   | 3.44   | 3.12   | 3.05   | 3.43   | 1.87   |
| Nd <sub>2</sub> O <sub>3</sub>            | 13.60  | 14.11  | 15.60  | 12.25  | 11.96  | 12.51  | 12.78  | 13.43  | 12.67  | 12.64  | 10.48  |
| Sm <sub>2</sub> O <sub>3</sub>            | 2.09   | 2.04   | 3.20   | 1.65   | 1.97   | 2.07   | 2.04   | 2.19   | 2.14   | 2.13   | 1.85   |
| Gd <sub>2</sub> O <sub>3</sub>            | 1.24   | 1.45   | 2.22   | 0.76   | 1.09   | 0.93   | 1.08   | 1.14   | 1.04   | 1.07   | 1.68   |
| ThO <sub>2</sub>                          | b.d.l. | b.d.l. | b.d.l. | 0.70   | 1.21   | b.d.l. | b.d.l. | b.d.l. | b.d.l. | b.d.l. | 1.19   |
| Total                                     | 98.20  | 97.45  | 98.80  | 99.81  | 98.98  | 98.23  | 99.57  | 99.67  | 98.40  | 99.14  | 99.06  |
| Structural formulae on basis of 4 oxygens |        |        |        |        |        |        |        |        |        |        |        |
| Si                                        | 0.031  | 0.016  | 0.010  | 0.206  | 0.075  | 0.011  | 0.014  | 0.000  | 0.000  | 0.027  | 0.117  |
| Fe                                        | 0.036  | 0.046  | 0.056  | 0.036  | 0.118  | 0.033  | 0.030  | 0.031  | 0.033  | 0.046  | 0.000  |
| Ca                                        | 0.017  | 0.026  | 0.032  | 0.009  | 0.033  | 0.031  | 0.023  | 0.021  | 0.042  | 0.030  | 0.055  |
| Ce                                        | 0.452  | 0.474  | 0.434  | 0.418  | 0.435  | 0.480  | 0.486  | 0.479  | 0.473  | 0.486  | 0.398  |
| La                                        | 0.219  | 0.189  | 0.181  | 0.195  | 0.167  | 0.214  | 0.219  | 0.234  | 0.235  | 0.227  | 0.261  |
| Pr                                        | 0.047  | 0.052  | 0.054  | 0.041  | 0.046  | 0.050  | 0.049  | 0.045  | 0.044  | 0.050  | 0.026  |
| Nd                                        | 0.192  | 0.202  | 0.221  | 0.166  | 0.174  | 0.177  | 0.180  | 0.190  | 0.181  | 0.181  | 0.144  |
| Sm                                        | 0.029  | 0.028  | 0.044  | 0.022  | 0.028  | 0.028  | 0.028  | 0.030  | 0.029  | 0.029  | 0.024  |
| Gd                                        | 0.016  | 0.019  | 0.029  | 0.010  | 0.015  | 0.012  | 0.014  | 0.015  | 0.014  | 0.014  | 0.021  |
| Th                                        | 0.000  | 0.000  | 0.000  | 0.006  | 0.011  | 0.000  | 0.000  | 0.000  | 0.000  | 0.000  | 0.010  |
| Total                                     | 1.039  | 1.052  | 1.061  | 1.109  | 1.102  | 1.038  | 1.043  | 1.044  | 1.052  | 1.090  | 1.057  |
| P                                         | 0.993  | 0.986  | 0.983  | 0.986  | 0.986  | 0.992  | 0.987  | 0.984  | 0.984  | 0.967  | 1.002  |

Note. b.d.l. - below detection limit; are based on 4 oxygens

**Table S4.** Representative EPMA of REE fluorcarbonate, wt. %.

| Oxide<br>wt. %                 | 7821-3 | 7821-2 | 7821-2 | 7821-3 | 7821-3 | 7821-3 | 7821-3 | 7821-3 | 7821-3 | 7821-3 |
|--------------------------------|--------|--------|--------|--------|--------|--------|--------|--------|--------|--------|
|                                | 1      | 2      | 3      | 4      | 5      | 6      | 7      | 8      | 9      | 10     |
| CaO                            | 3.38   | 10.45  | 11.76  | 17.02  | 17.53  | 18.00  | 13.55  | 18.84  | 17.92  | 18.71  |
| Ce <sub>2</sub> O <sub>3</sub> | 32.45  | 25.65  | 25.48  | 24.41  | 20.17  | 19.62  | 23.13  | 19.91  | 19.29  | 20.02  |
| La <sub>2</sub> O <sub>3</sub> | 14.68  | 14.31  | 14.19  | 15.15  | 9.32   | 8.93   | 12.44  | 9.99   | 9.47   | 10.67  |
| Pr <sub>2</sub> O <sub>3</sub> | 3.20   | 2.43   | 2.60   | 1.63   | 2.15   | 2.36   | 2.41   | 2.00   | 1.95   | 2.14   |
| Nd <sub>2</sub> O <sub>3</sub> | 13.81  | 9.89   | 10.48  | 6.62   | 9.86   | 9.47   | 10.26  | 9.64   | 9.49   | 9.59   |
| Sm <sub>2</sub> O <sub>3</sub> | 2.08   | 1.50   | 1.54   | 0.00   | 2.07   | 2.15   | 1.87   | 1.59   | 1.27   | 1.87   |
| Eu <sub>2</sub> O <sub>3</sub> | 0.00   | 0.00   | 0.00   | 0.00   | 0.00   | 0.00   | 0.00   | 0.00   | 0.00   | 0.85   |
| Gd <sub>2</sub> O <sub>3</sub> | 1.15   | 0.87   | 0.00   | 0.00   | 1.51   | 1.70   | 1.23   | 1.35   | 1.33   | 1.41   |
| Y <sub>2</sub> O <sub>3</sub>  | 2.15   | 0.81   | 1.95   | 1.31   | 3.72   | 4.53   | 2.09   | 2.41   | 3.45   | 2.02   |
| ThO <sub>2</sub>               | b.d.l. | 2.78   | b.d.l. | 0.93   | b.d.l. | b.d.l. | b.d.l. | 0.63   | 1.53   | b.d.l. |
| F                              | 6.82   | 5.86   | 5.93   | 4.15   | 4.09   | 4.74   | 3.56   | 5.59   | 5.73   | 3.70   |
| Total                          | 79.73  | 74.56  | 73.93  | 71.22  | 70.41  | 71.51  | 70.54  | 71.94  | 71.43  | 70.98  |
| Structural formulae            |        |        |        |        |        |        |        |        |        |        |
| Ca                             | 0.124  | 0.995  | 1.063  | 0.980  | 0.968  | 0.963  | 0.811  | 1.062  | 1.003  | 1.047  |
| Ce                             | 0.406  | 0.834  | 0.787  | 0.480  | 0.381  | 0.359  | 0.473  | 0.383  | 0.369  | 0.383  |
| La                             | 0.185  | 0.469  | 0.441  | 0.300  | 0.177  | 0.165  | 0.256  | 0.194  | 0.182  | 0.206  |
| Pr                             | 0.040  | 0.079  | 0.080  | 0.032  | 0.040  | 0.043  | 0.049  | 0.038  | 0.037  | 0.041  |
| Nd                             | 0.168  | 0.314  | 0.316  | 0.127  | 0.181  | 0.169  | 0.205  | 0.181  | 0.177  | 0.179  |
| Sm                             | 0.025  | 0.046  | 0.045  | 0.000  | 0.037  | 0.037  | 0.036  | 0.029  | 0.023  | 0.034  |
| Eu                             | 0.000  | 0.000  | 0.000  | 0.000  | 0.000  | 0.000  | 0.000  | 0.000  | 0.000  | 0.015  |
| Gd                             | 0.013  | 0.026  | 0.000  | 0.000  | 0.026  | 0.028  | 0.023  | 0.023  | 0.023  | 0.024  |
| Y                              | 0.039  | 0.039  | 0.088  | 0.037  | 0.102  | 0.121  | 0.062  | 0.067  | 0.096  | 0.056  |
| Th                             | 0.000  | 0.056  | 0.000  | 0.011  | 0.000  | 0.000  | 0.000  | 0.008  | 0.018  | 0.000  |
| Total                          | 0.999  | 2.857  | 2.818  | 1.968  | 1.911  | 1.884  | 1.915  | 1.986  | 1.928  | 1.984  |
| F                              | 0.736  | 1.647  | 1.582  | 0.705  | 0.666  | 0.749  | 0.629  | 0.929  | 0.947  | 0.611  |
| OH*                            | 0.264  | 0.353  | 0.611  | 0.295  | 0.334  | 0.251  | 0.371  | 0.071  | 0.053  | 0.389  |

Note. 1 - bastnäsite-(Ce), 2,3 - parisite-(Ce), 4-10 - synchysite-(Ce); \* - by stoichiometry. b.d.l. - below detection limit. Structural formulae on basis of 4 anions (1), 11 anions (2,3), 7 anions (4-10).

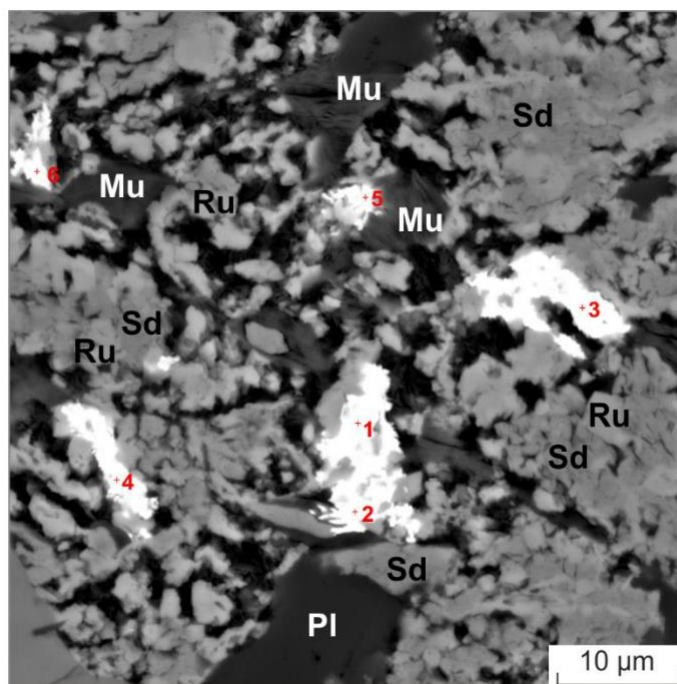

**Figure S5.** Unidentified REE phases (white) in rutile (Rt) – siderite (Sd) – muscovite (Ms) aggregate. BSE image. The analysis point is indicated by the red cross and Arabic numeral.

**Table S5.** EPMA of unidentified REE phases, wt. %

| Sample                         | 7821-3 | 7821-3 | 7821-3 | 7821-3 | 7821-3 | 7821-3 |
|--------------------------------|--------|--------|--------|--------|--------|--------|
| Point                          | 1      | 2      | 3      | 4      | 5      | 6      |
| SiO <sub>2</sub>               | 1.26   | 2.14   | 5.9    | 6.5    | 7.44   | 5.99   |
| TiO <sub>2</sub>               | 21.22  | 8.79   | 18.00  | 6.46   | 25.85  | 18.47  |
| Al <sub>2</sub> O <sub>3</sub> | 0.72   | 1.34   | 3.74   | 4.01   | 4.69   | 3.87   |
| FeO                            | 0.49   | 0.78   | 1.34   | 1.36   | 1.13   | 1.35   |
| CaO                            | 12.4   | 13.19  | 8.93   | 7.78   | 6.87   | 7.88   |
| K <sub>2</sub> O               | 0.29   | 0.35   | 0.88   | 0.72   | 0.76   | 0.84   |
| Ce <sub>2</sub> O <sub>3</sub> | 14.24  | 17.71  | 15.23  | 20.51  | 13.93  | 15.88  |
| La <sub>2</sub> O <sub>3</sub> | 7.24   | 8.07   | 7.41   | 10.51  | 7.11   | 7.92   |
| Pr <sub>2</sub> O <sub>3</sub> | b.d.l  | 1.85   | 1.26   | 1.9    | 1.3    | 1.56   |
| Nd <sub>2</sub> O <sub>3</sub> | 7.08   | 8.56   | 6.56   | 8.57   | 6.31   | 6.78   |
| Sm <sub>2</sub> O <sub>3</sub> | b.d.l  | 1.33   | 0.94   | 1.04   | 0.97   | 1.00   |
| Gd <sub>2</sub> O <sub>3</sub> | b.d.l  | 1.04   | 0.78   | b.d.l  | 0.78   | 0.74   |
| Y <sub>2</sub> O <sub>3</sub>  | 2.73   | 2.87   | 1.24   | 1.3    | 1.26   | 0.95   |
| ThO <sub>2</sub>               | b.d.l  | b.d.l  | 0.81   | 0.88   | 0.8    | 1.09   |
| F                              | 4.42   | 4.22   | 3.25   | 5.62   | 6.99   | 4.75   |
| Total                          | 72.09  | 72.24  | 76.27  | 77.16  | 86.19  | 79.07  |

Note. b.d.l. - below detection limit
